# Supplementary material for: Beyond Quantities: Machine Learning-based Characterization of Inequality in Infrastructure Quality Provision in Cities
Source: Research Square preprint supplement (doi:10.21203/rs.3.rs-3955357/v1), 2024-03-04
Supplement: Supplementary file 1 [file 333d3a49328ae19bfbe84cef.pdf]

## Supplementary document

- Fig1-5: SHAP dependence plot of each infrastructure features for the five cities:
- Fig 6-9: Comparison results for quantity-based infrastructure provision and infrastructure quality provision:
- Table 1: Silhouette Score of K-Means
- Table 2: Parameter ranges and optimal values for XGBoost Model

# Dallas

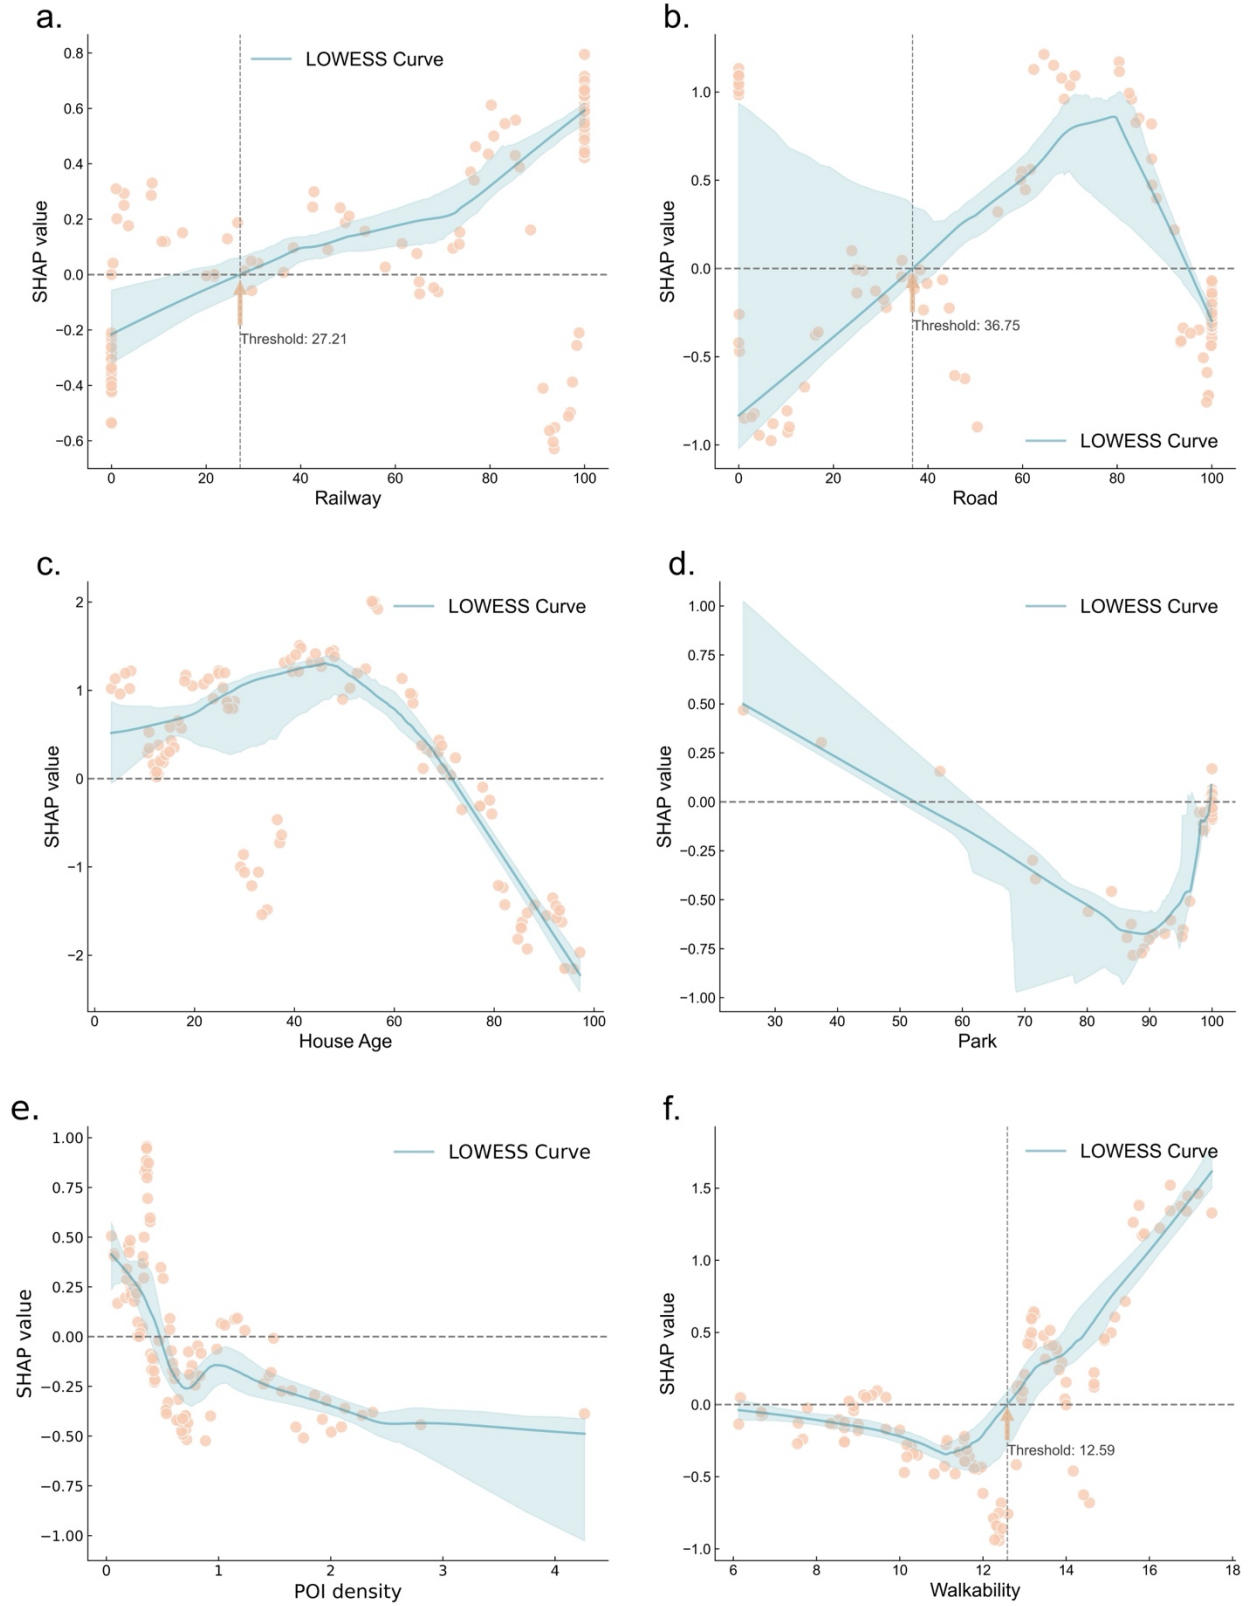

Fig 1. SHAP dependence plot for Dallas

# Houston

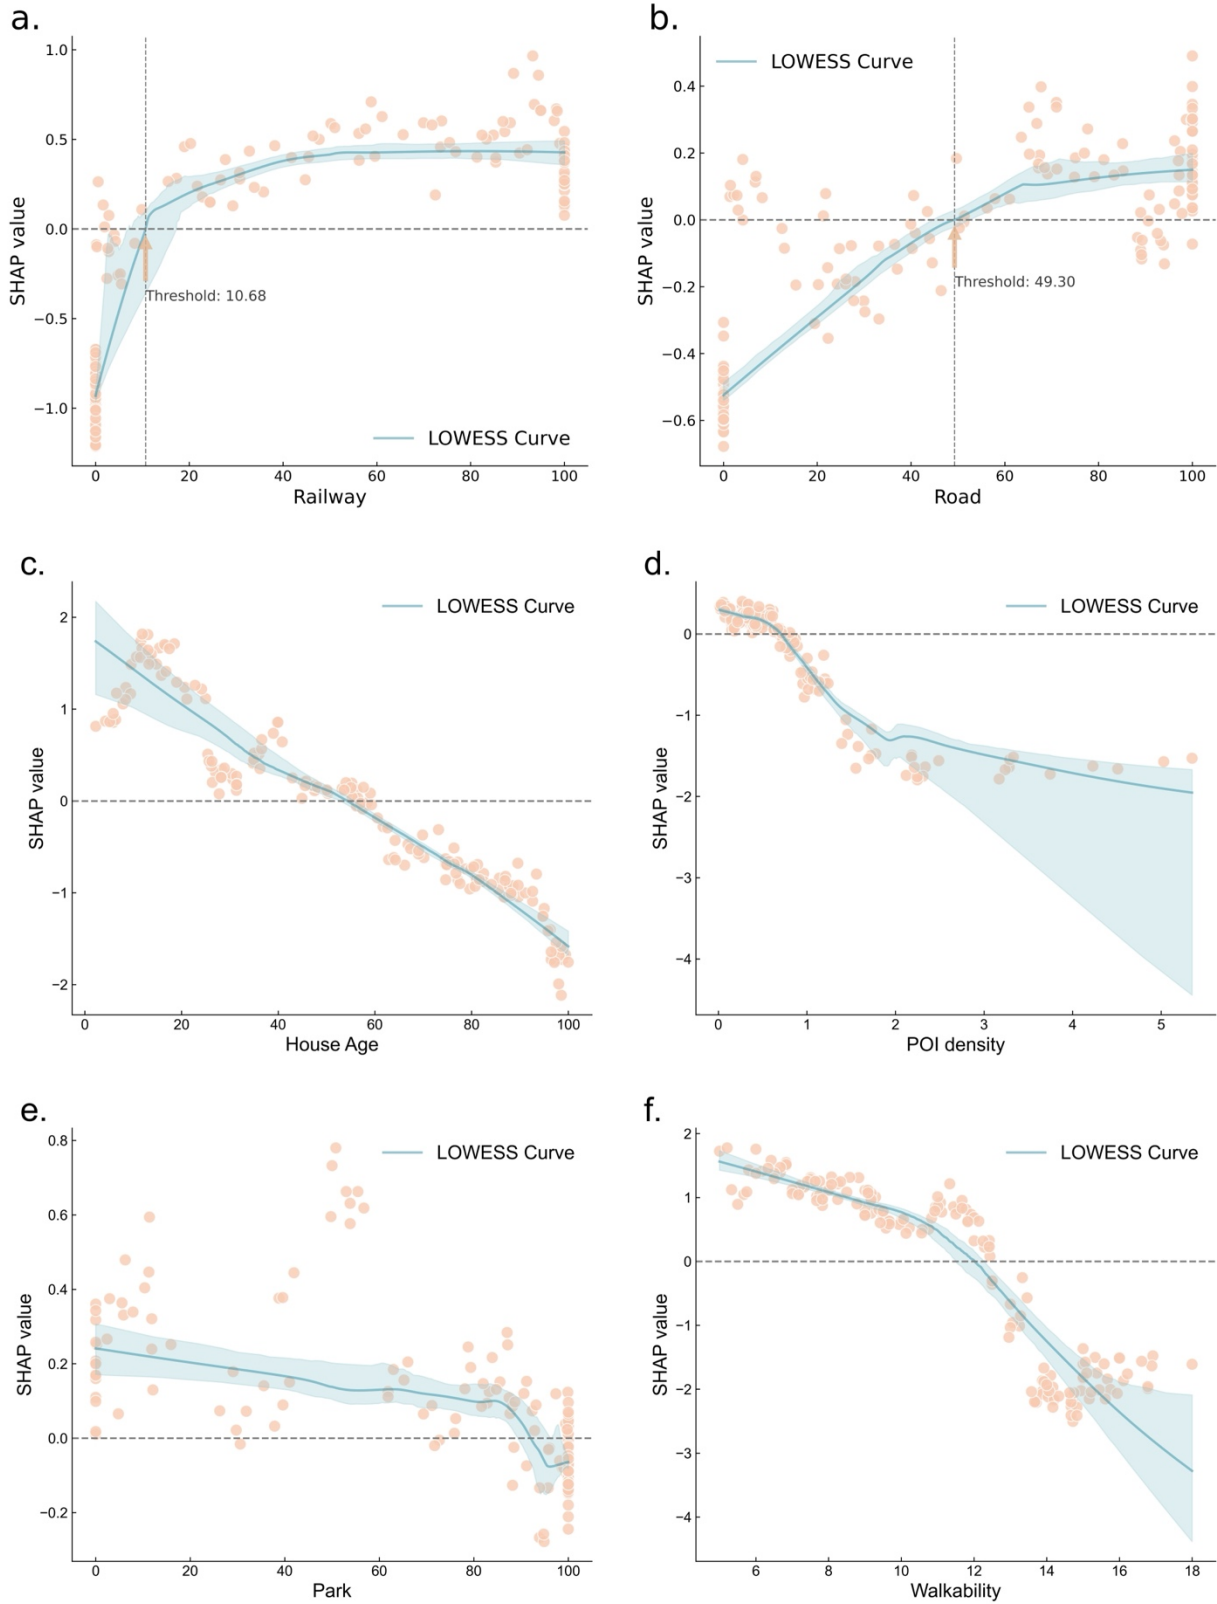

Fig 2. SHAP dependence plot for Houston

# Detroit

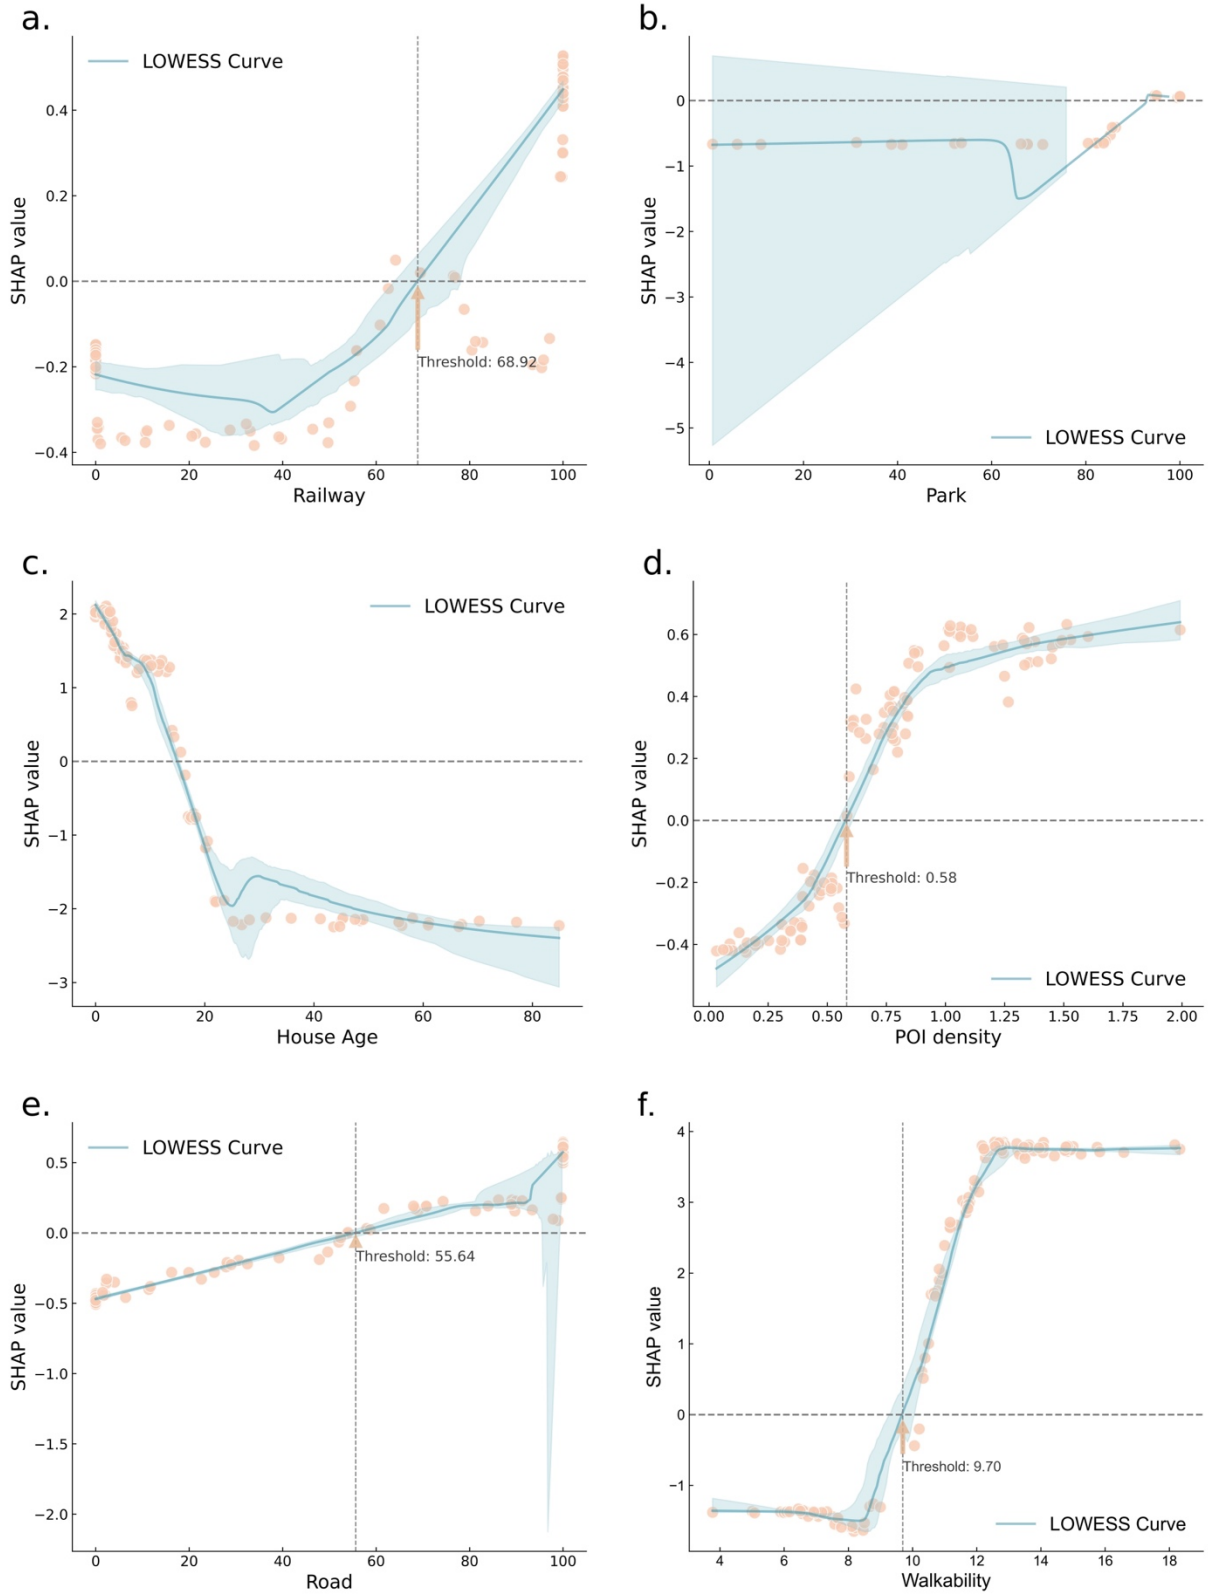

Fig 3. SHAP dependence plot for Detroit

# Los Angeles

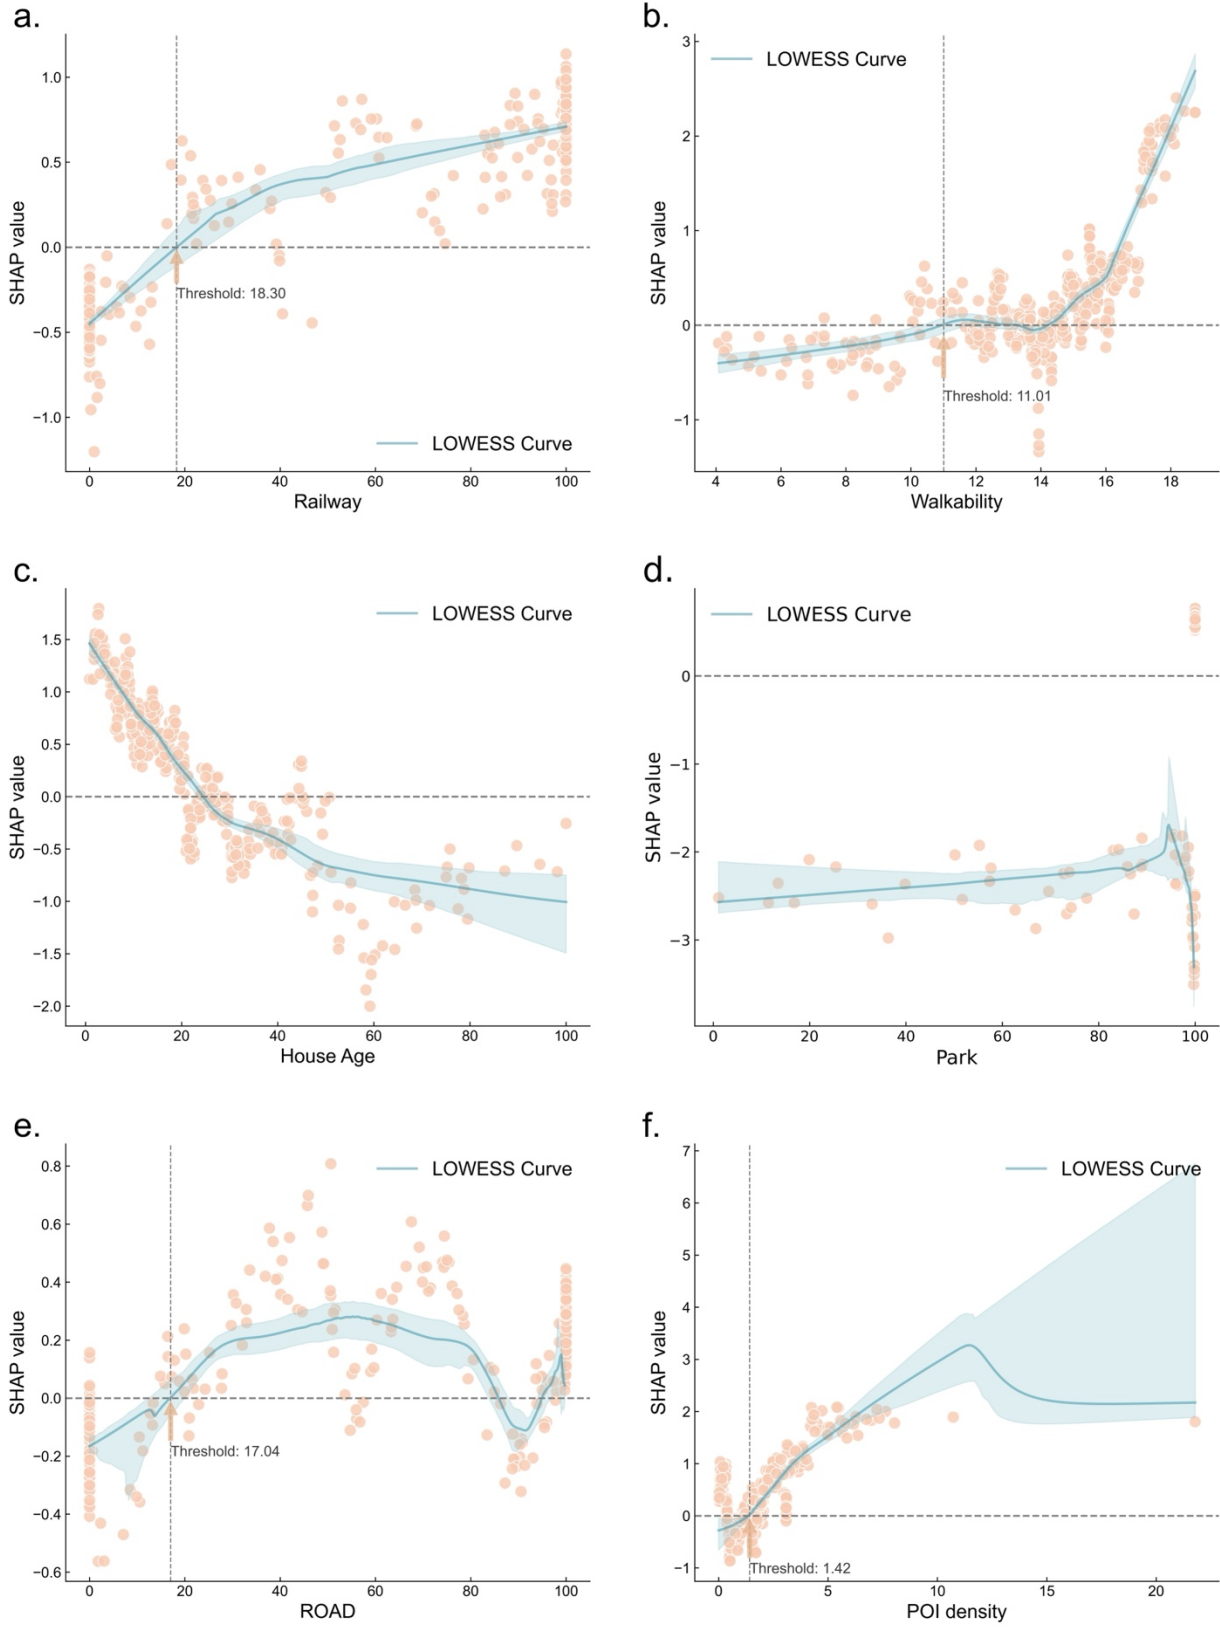

Fig 4. SHAP dependence plot for Los Angeles

# Chicago

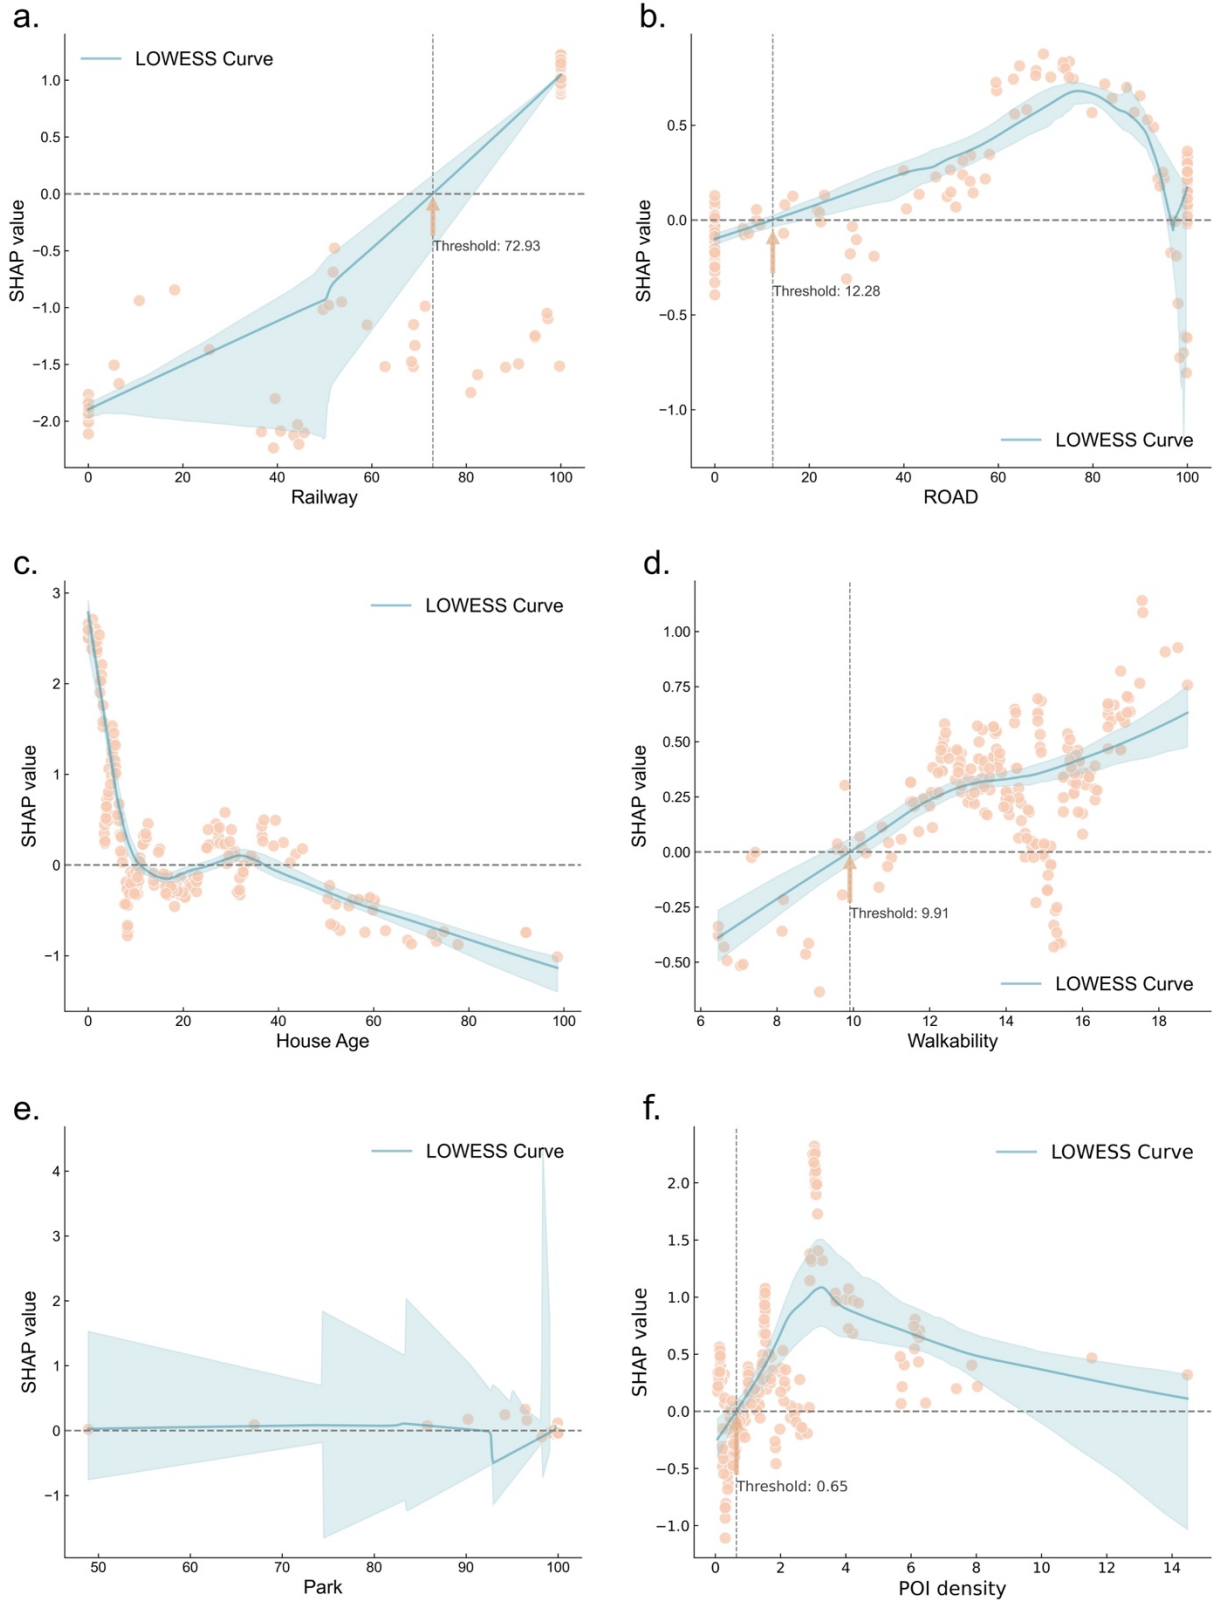

Fig 5. SHAP dependence plot for Chicago

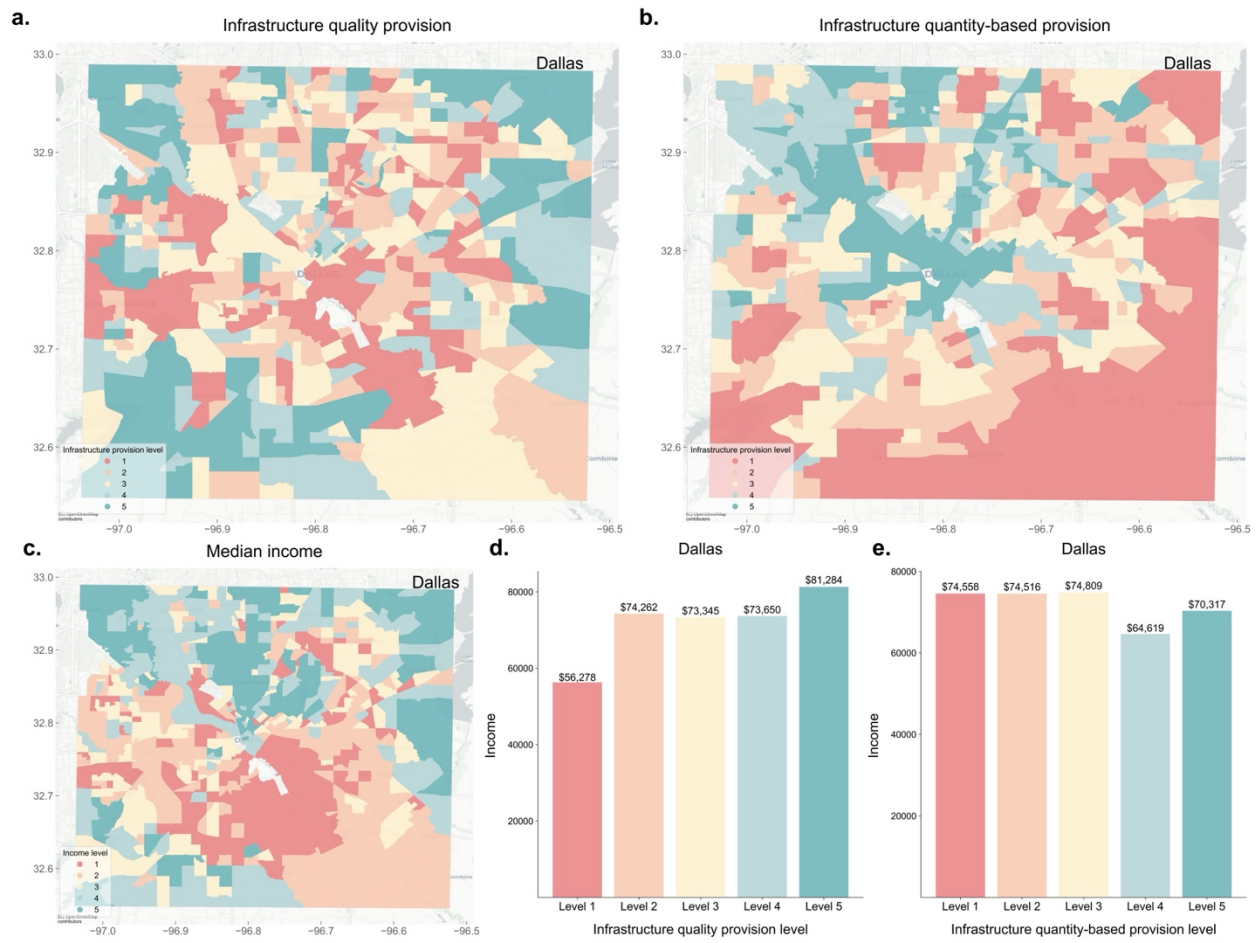

Fig 6. Comparison between quality- and quantity-based infrastructure provision for Dallas

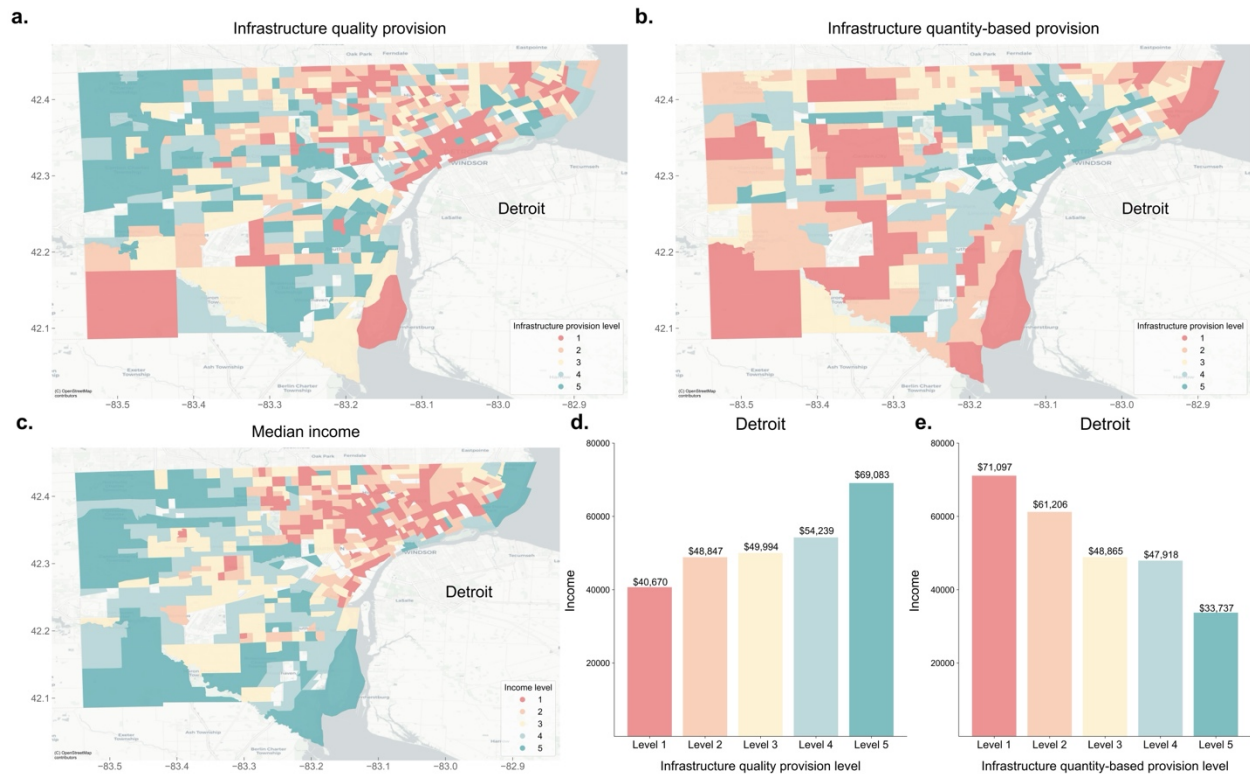

Fig 7. Comparison between quality- and quantity-based infrastructure provision for Detroit

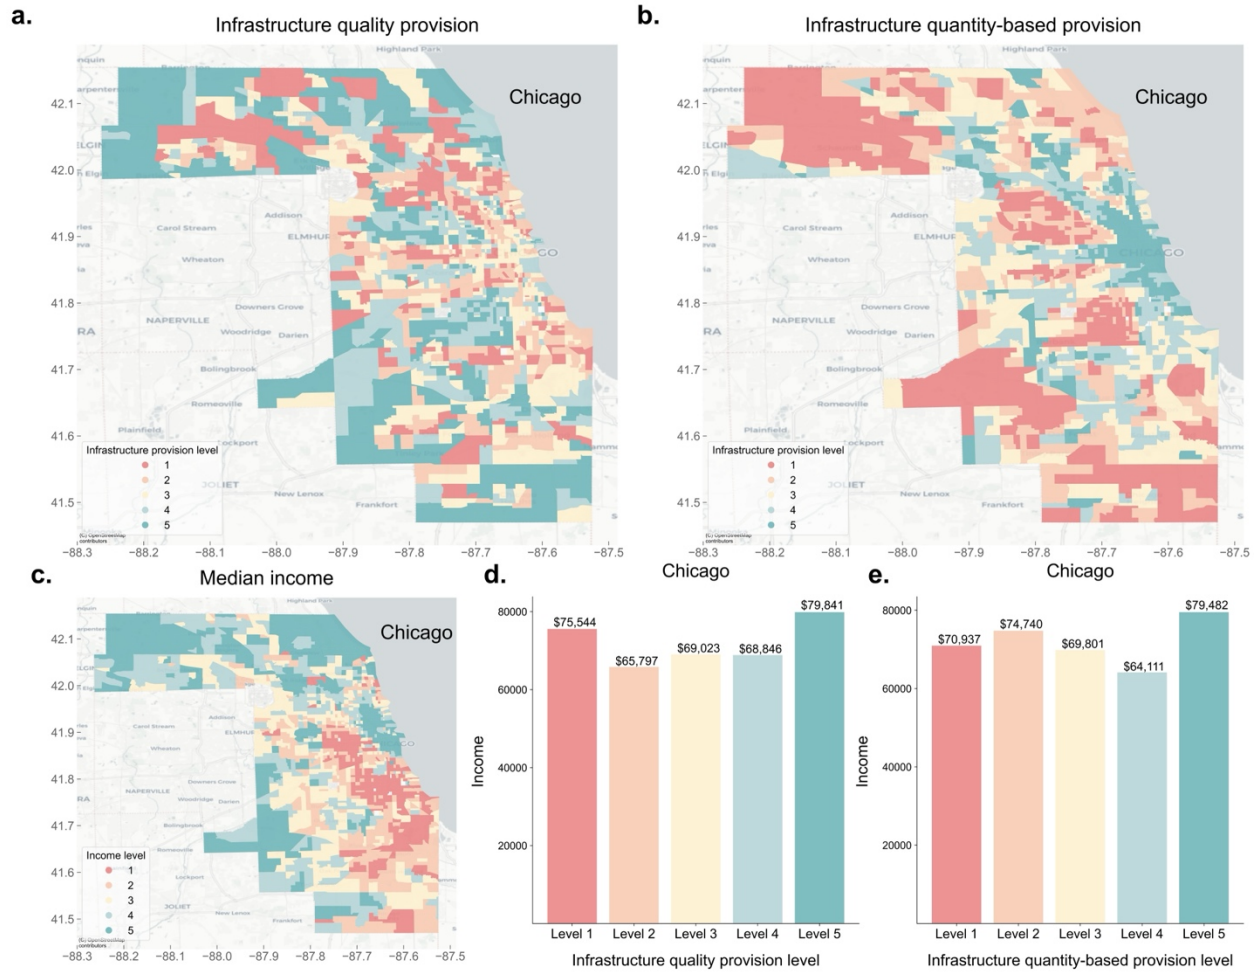

Fig 8. Comparison between quality- and quantity-based infrastructure provision for Chicago

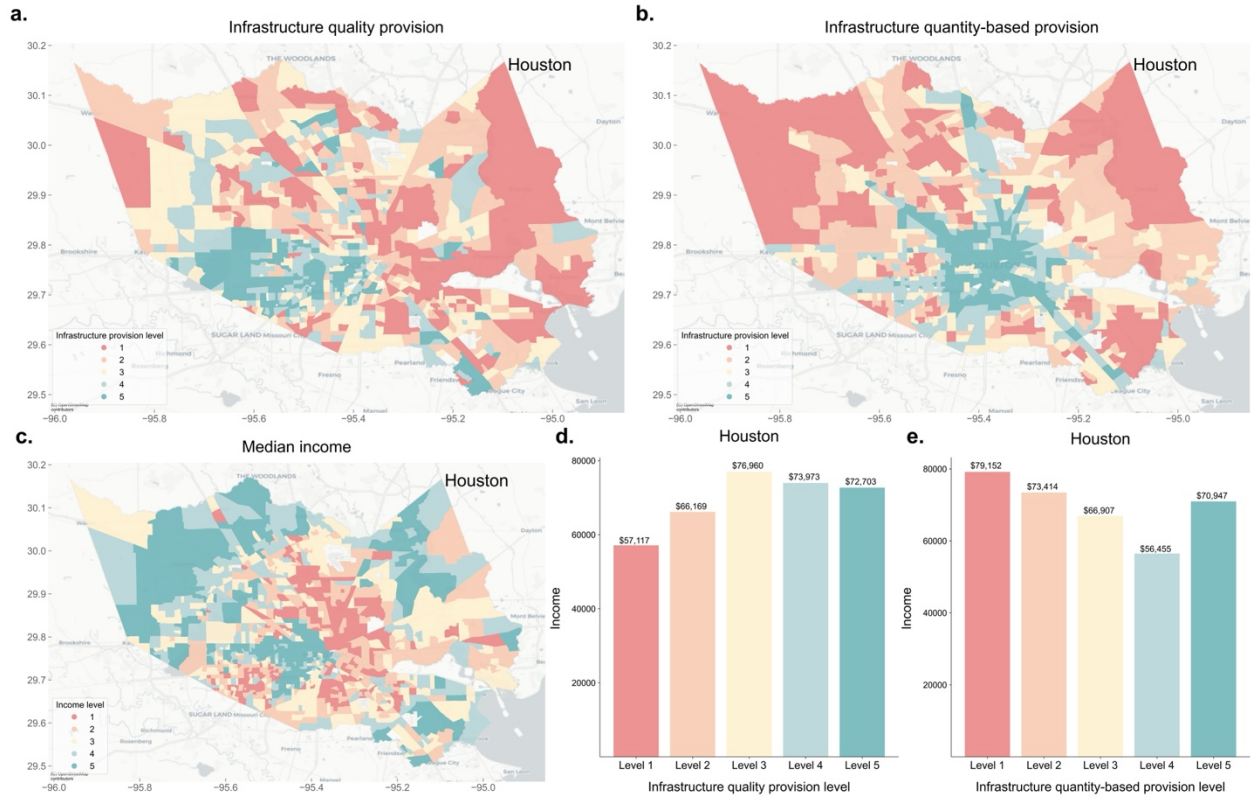

Fig 9. Comparison between quality- and quantity-based infrastructure provision for Dallas

Table 1. Silhouette Score of K-Means

| Area        | Silhouette Score |
|-------------|------------------|
| Houston     | 0.59             |
| Dallas      | 0.42             |
| Detroit     | 0.54             |
| Chicago     | 0.52             |
| Los Angeles | 0.45             |

Table 2. Parameter ranges and optimal values for XGBoost Model

| Parameters  | Learning rate | N_estimators      | Max_depth       | Min_child_weight | Subsample  | Gamma    | Reg_lambda                |
|-------------|---------------|-------------------|-----------------|------------------|------------|----------|---------------------------|
| Range       | [0.01, 03]    | [50, 51, ...,200] | [3, 4, ..., 10] | [1, 2, ..., 6]   | [0.6, 1.0] | [0, 0.5] | [0.1, 0.5, 1.0, 1.5, 2.0] |
| Houston     | 0.08          | 163               | 9               | 1                | 0.93       | 0.43     | 0.5                       |
| Dallas      | 0.14          | 105               | 9               | 2                | 0.88       | 0.22     | 1.0                       |
| Detroit     | 0.04          | 160               | 5               | 2                | 0.68       | 0.04     | 2.0                       |
| Chicago     | 0.20          | 55                | 8               | 2                | 0.80       | 0.21     | 1.5                       |
| Los Angeles | 0.14          | 105               | 9               | 2                | 0.88       | 0.22     | 1.0                       |
